# Supplementary material
Source: Royal Society of Chemistry journal article supplement (doi:10.1039/d5cp02619a)
Supplement: d5cp02619a1.pdf [file d5cp02619a1.pdf]

## Supplementary Material (SM)

### Catalytic Decomposition of Ammonium Perchlorate at BpyNO

#### Interfaces: A Neural Network Potential Perspective

Wenjuan Li<sup>a</sup>, Mingjie Wen<sup>a</sup>, Jiahe Han<sup>a</sup>, Zhixiang Zhang<sup>b</sup>, Yingzhe Liu<sup>b</sup>, Qingzhao Chu<sup>a</sup>,

Dongping Chen<sup>a,\*</sup>

<sup>a</sup> *State Key Laboratory of Explosion Science and Safety Protection, Beijing Institute of Technology, Beijing 100081, P. R. China*

<sup>b</sup> *Xi'an Modern Chemistry Research Institute, Xi'an 710065, P. R. China*

In the supplementary materials, we present:

1. **Figure S1** Morphology of AP and AP/BpyNO composites during heating. The C, H, N, O, and Cl atoms are represented in gray, white, blue, red, and green, respectively.
2. **Figure S2** Decomposition mechanism of AP.
3. **Figure S3** Decomposition mechanism of BpyNO.
4. **Figure S4** Initial decomposition products (left) and major gas-phase products (right) of AP/Bpy (a) and AP/Bph (b).

---

\* Co-corresponding author: chuqz@bit.edu.cn (Q. Z. Chu).

\*\* Co-corresponding author: eslami@umz.ac.ir (A. Eslami).

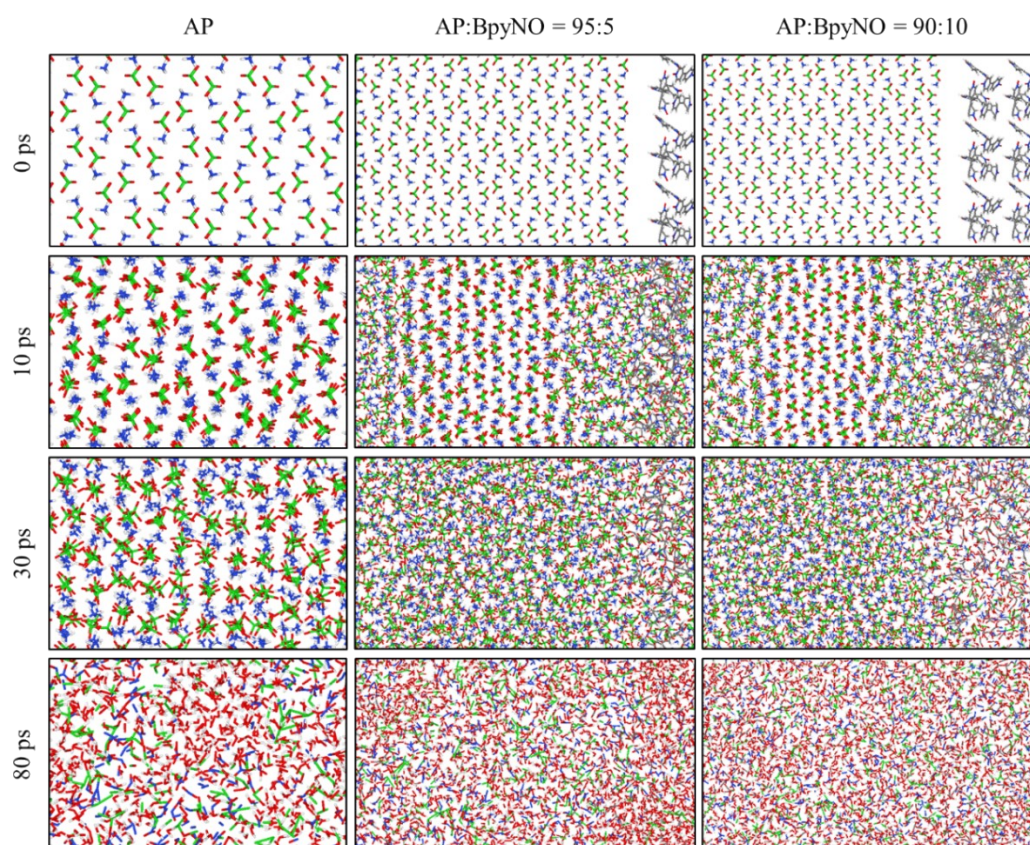

**Fig. S1.** Morphology of AP and AP/BpyNO composites during heating. The C, H, N, O, and Cl atoms are represented in gray, white, blue, red, and green, respectively.



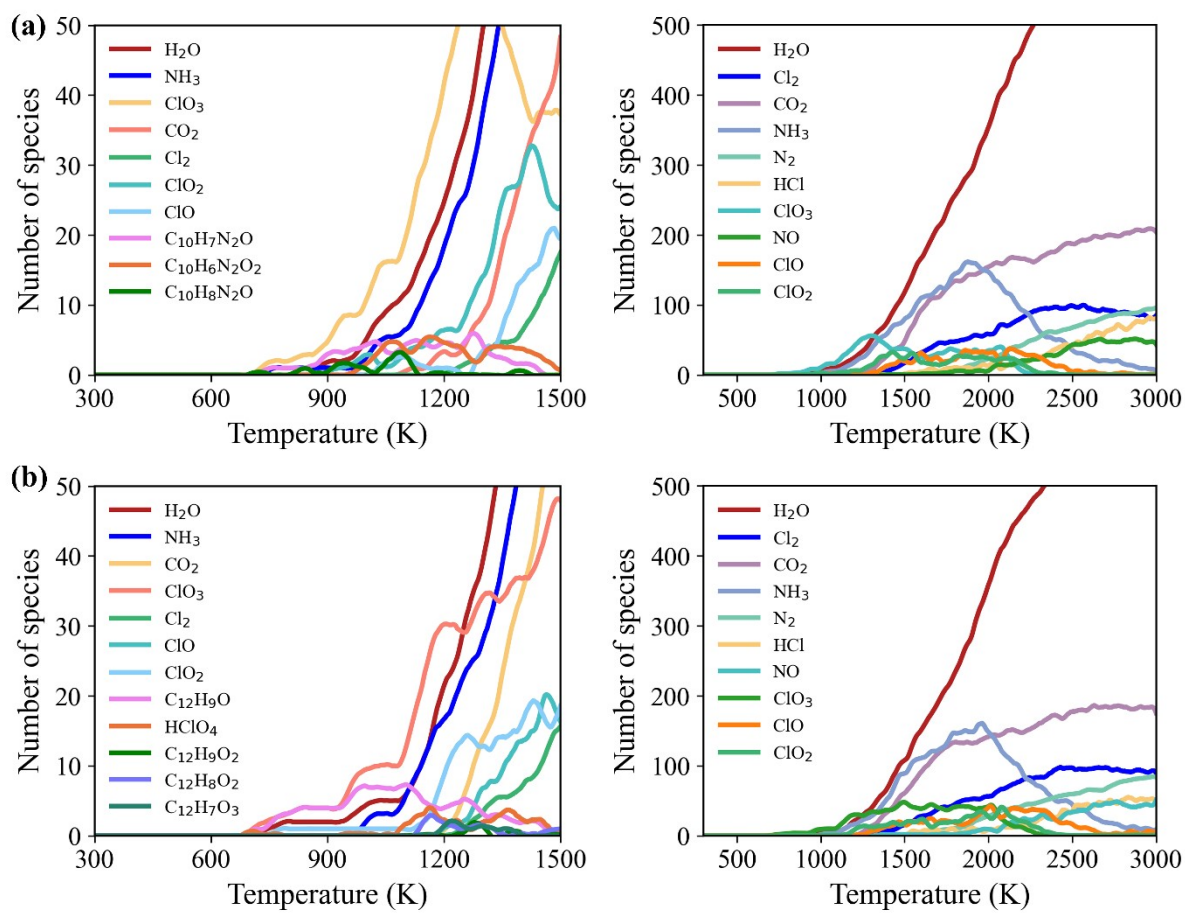

**Figure S4** Initial decomposition products (left) and major gas-phase products (right) of AP/Bpy (a) and AP/Bph (b).
